# Supplementary material for: Etiology, 3-Month Functional Outcome and Recurrent Events in Non-Traumatic Intracerebral Hemorrhage
Source: PubMed Central journal article supplement — J Stroke. 2022 May 31;24(2):266–77. doi: 10.5853/jos.2021.01823 (PMC9194537; doi:10.5853/jos.2021.01823), 2022-05-31
Supplement: jos-2021-01823-suppl1.pdf [file jos-2021-01823-suppl1.pdf]

**Supplementary Table 1.** Comparison of baseline characteristics for patients with available vs. missing outcomes

| Characteristic                   | mRS available  | mRS missing    | <i>P</i> | Recurrent events available | Recurrent events missing | <i>P</i> |
|----------------------------------|----------------|----------------|----------|----------------------------|--------------------------|----------|
| Number                           | 2,250          | 400            |          | 2,259                      | 391                      |          |
| Age                              | 72 (14)        | 71 (14)        | 0.21     | 72 (14)                    | 71 (14)                  | 0.31     |
| NIHSS                            | 8 (3–16)       | 6 (2–13)       | <0.01    | 8 (3–15)                   | 8 (2–14)                 | 0.16     |
| GCS                              | 14 (12–15)     | 15 (14–15)     | <0.01    | 14 (12–15)                 | 15 (13–15)               | <0.01    |
| Systolic blood pressure          | 165 (144–186)  | 166 (145–186)  | 0.78     | 165 (143–186)              | 167 (147–189)            | 0.10     |
| Diastolic blood pressure         | 90 (78–101)    | 89 (78–100)    | 0.55     | 90 (78–100)                | 90 (80–104)              | 0.11     |
| Onset-to-admission time in hours | 3.7 (1.4–13.1) | 3.8 (1.3–16.9) | 0.71     | 3.9 (1.4–13.5)             | 3.3 (1.3–12.0)           | 0.25     |
| Female sex                       | 1,049 (46.7)   | 178 (45.1)     | 0.54     | 1,044 (46.3)               | 183 (47.3)               | 0.73     |
| Antiplatelet therapy             | 617 (28.6)     | 112 (28.9)     | 0.91     | 615 (28.4)                 | 114 (29.9)               | 0.54     |
| Anticoagulants                   | 508 (23.5)     | 60 (15.5)      | <0.01    | 516 (23.8)                 | 52 (13.6)                | <0.01    |
| Hypertension                     | 1,754 (80.2)   | 299 (78.1)     | 0.35     | 1,745 (79.6)               | 308 (81.3)               | 0.46     |
| Diabetes                         | 338 (15.5)     | 46 (12.0)      | 0.08     | 343 (15.7)                 | 41 (10.8)                | 0.02     |
| Hyperlipidemia                   | 942 (43.4)     | 154 (41.5)     | 0.50     | 943 (43.4)                 | 153 (41.6)               | 0.52     |
| Smoking                          | 264 (12.1)     | 42 (11.0)      | 0.54     | 261 (12.0)                 | 45 (12.0)                | 0.99     |
| Atrial fibrillation              | 417 (19.1)     | 50 (13.1)      | <0.01    | 423 (19.3)                 | 44 (11.7)                | <0.01    |
| History of ischemic stroke       | 260 (11.9)     | 30 (7.8)       | 0.02     | 260 (11.9)                 | 30 (7.9)                 | 0.03     |
| History of ICH                   | 241 (11.0)     | 39 (10.2)      | 0.61     | 248 (11.3)                 | 32 (8.4)                 | 0.10     |
| Treatment at stroke center       | 1,799 (80.0)   | 253 (63.2)     | <0.01    | 1,791 (79.3)               | 261 (66.8)               | <0.01    |
| Discharged to                    |                |                | <0.01    |                            |                          | <0.01    |
| Home                             | 371 (21.3)     | 89 (24.2)      |          | 381 (21.8)                 | 79 (21.7)                |          |
| Nursing home                     | 118 (6.8)      | 25 (6.8)       |          | 117 (6.7)                  | 26 (7.1)                 |          |
| Other acute hospital             | 291 (16.7)     | 89 (24.2)      |          | 284 (16.2)                 | 96 (26.4)                |          |
| Rehabilitation                   | 964 (55.3)     | 165 (44.8)     |          | 966 (55.3)                 | 163 (44.8)               |          |

Values are presented as number (%) or median (interquartile range). NIHSS, National Institutes of Health Stroke Scale; GCS, Glasgow coma scale; ICH, intracerebral hemorrhage.

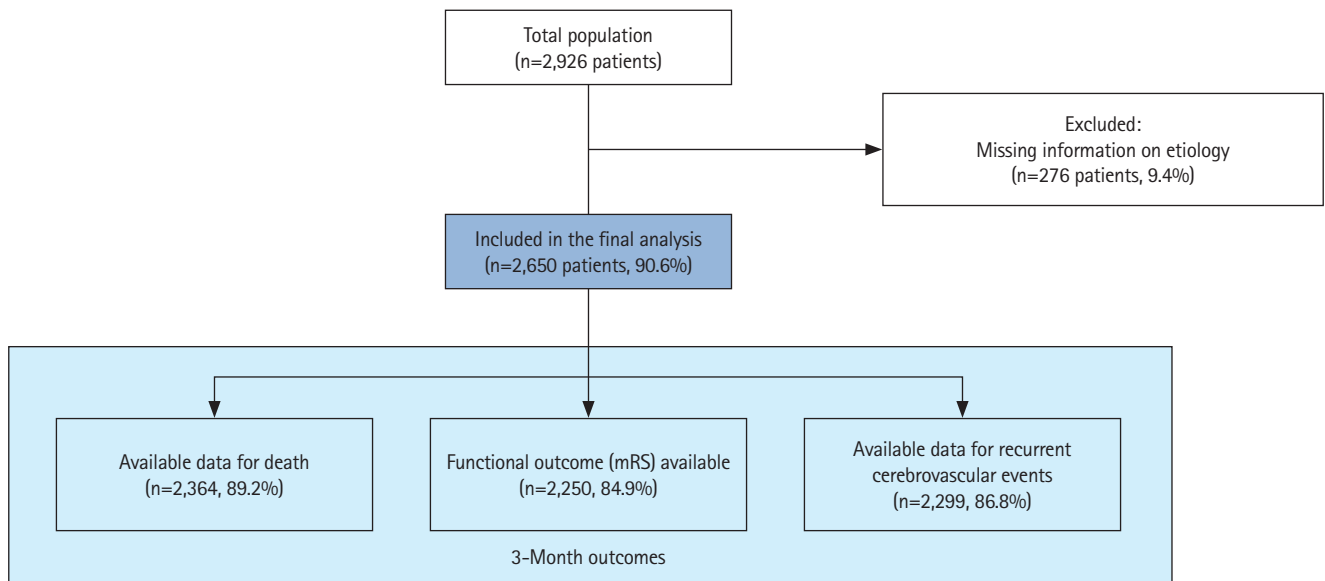

**Supplementary Figure 1.** Study flowchart. mRS, modified Rankin Scale.
